# Supplementary material for: Multiparasitism enables a specialist endoparasitoid to complete parasitism in an unsuitable host caterpillar
Source: Springer Nature journal article supplement (doi:10.1038/s41598-025-91403-3), 2025-03-11
Supplement: MOESM1 [file 41598_2025_91403_MOESM1_ESM.pdf]

# Supporting Information

Authors: Kazumu Kuramitsu, Yooichi Kainoh and Kotaro Konno

Title: Multiparasitism enables a specialist endoparasitoid to complete parasitism in an unsuitable host caterpillar

Figure S1

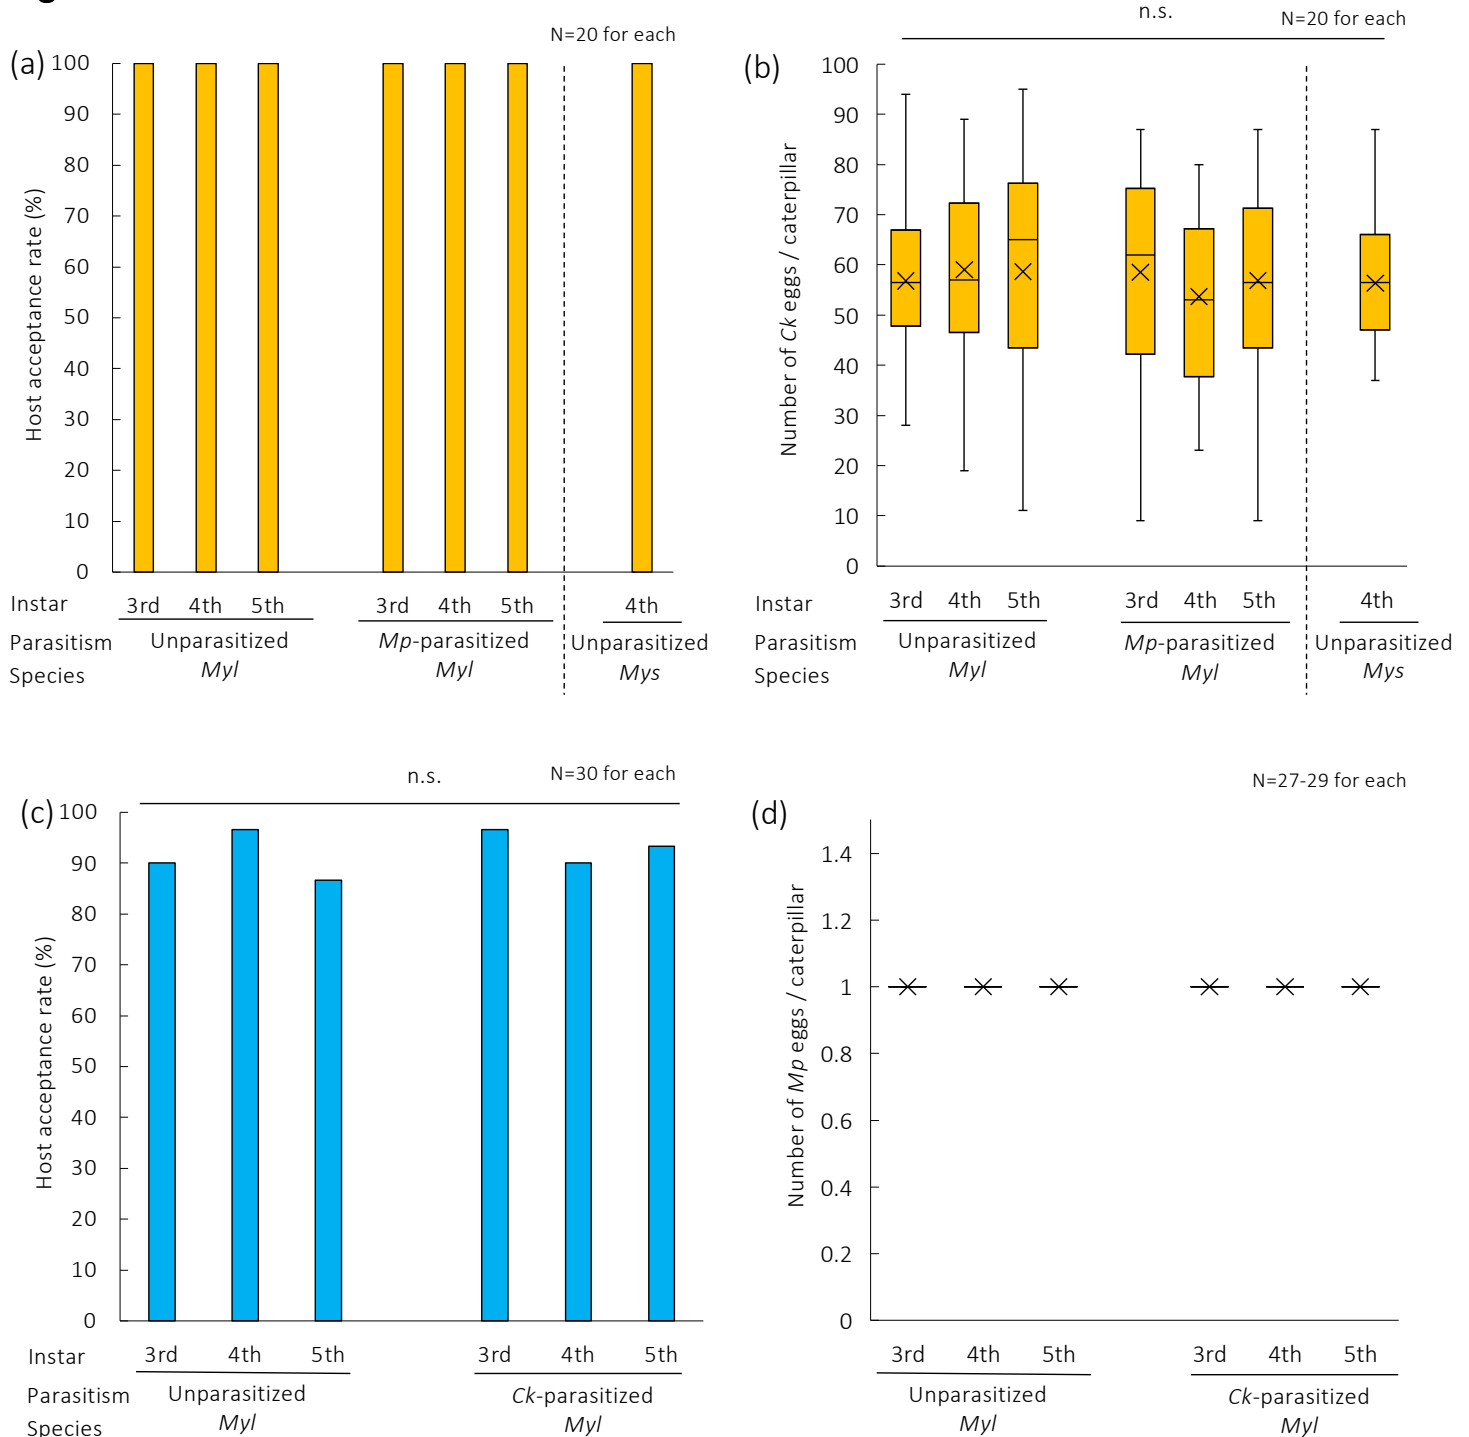

**Supplementary Figure S1. Host acceptance and oviposition by *Cotesia kariyai* and *Meteorus pulchricornis* to unparasitized *Mythimna loreyi* caterpillars and caterpillars previously oviposited by another parasitoid.**

Host acceptance (a, c) and number of eggs found in the caterpillar body (b, d) by *C. kariyai* (a, b) and *M. pulchricornis* (c, d). *Myl* = *Mythimna loreyi*, *Mys* = *My. separata*, *Ck* = *Cotesia kariyai*, and *Mp* = *Meteorus pulchricornis*. (n.s.: no significant differences, by ANOVA (b) or Chi-square test (c))

Figure S2

(a) *Ck* x *Myl*

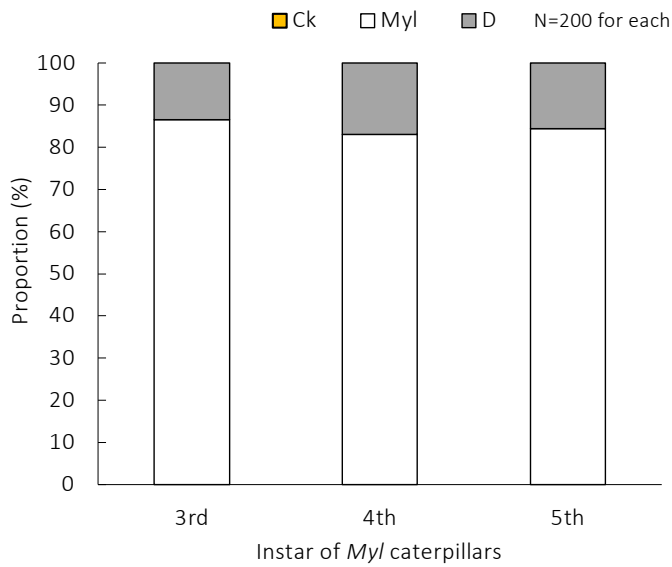

(b) *Mp* x *Myl*

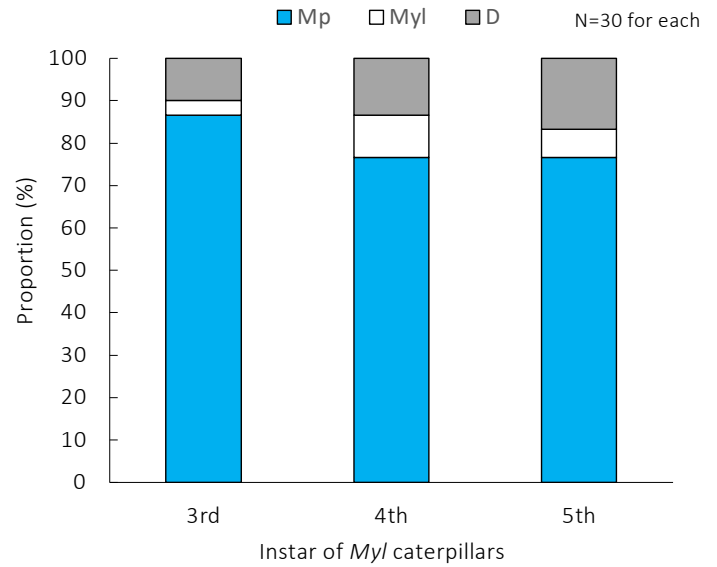

**Supplementary Figure S2. Successful parasitism rate of *Cotesia kariyai* (a) and *Meteorus pulchricornis* (b) in *Mythemna loreyi* caterpillars.** Female parasitoids were allowed to oviposit into 3<sup>rd</sup>, 4<sup>th</sup> or 5<sup>th</sup> instar *Myl* caterpillars, and oviposited caterpillars were reared individually to examine the host suitability.

*Myl* = *Mythemna loreyi*, *Ck* = *Cotesia kariyai* and *Mp* = *Meteorus pulchricornis*.

(n.s.: no significant differences by Chi-square test)

Figure S3

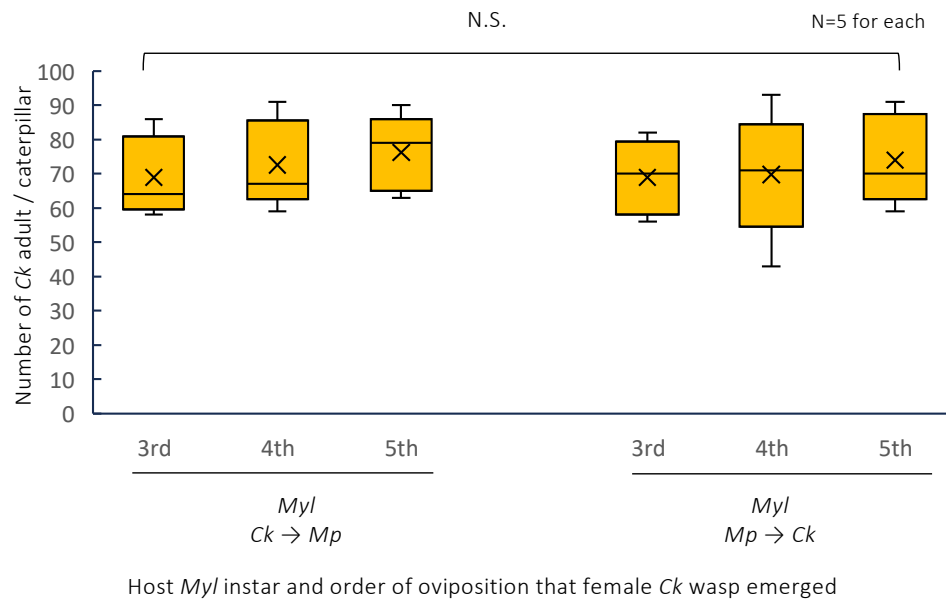

**Supplementary Figure S3. Reproductive ability of *Cotesia kariyai* emerged from *Mythimna loreyi*.** Number of emerged *Ck* wasps per *Mythimna separata* caterpillar after oviposition by *Ck*, which emerged from *Myl* under different multiparasitism conditions (instar and order of oviposition by two parasitoids).  
*Myl* = *Mythimna loreyi*, *Mys* = *My. separata*, *Ck* = *Cotesia kariyai* and *Mp* = *Meteorus pulchricornis*.  
 (n.s.: no significant differences by ANOVA)
